# Supplementary material for: High-throughput phenotyping using digital and hyperspectral imaging-derived biomarkers for genotypic nitrogen response
Source: PubMed Central journal article supplement (PMC7382386; doi:10.1093/jxb/eraa143), 2020-03-18
Supplement: eraa143_suppl_supplementary_table.pdf [file eraa143_suppl_supplementary_table.pdf]

**Table S1.** Measured and estimated plant traits using destructive harvesting and digital imaging methods.

| <b>Plant trait</b>            | <b>Description</b>                                                                                                        |
|-------------------------------|---------------------------------------------------------------------------------------------------------------------------|
| Fresh Biomass (FB)            | The above ground shoot biomass including stem and leaves expressed in grams                                               |
| Estimated Shoot Biomass (ESB) | Estimated number of pixels from the identified plant involving three side views and one top view expressed in kilo pixels |
| Minimum Area Rectangle (MAR)  | Minimum area that encloses the identified plant expressed in pixels                                                       |
| Calliper Length (CL)          | Maximum distance from the bottom to the top of the identified plant expressed as pixels                                   |
| Convex Hull Area (CHA)        | Area of the convex hull that contains the plant expressed in pixels                                                       |
| Eccentricity (E)              | Extent of elliptical nature of the plant's spread, generally the value is between 0 and 1                                 |

**Table S2.** Computation of published vegetation indices.

| <b>Index</b>                                         | <b>Formula</b>                                                                                                                                                                                  | <b>Reference</b>                |
|------------------------------------------------------|-------------------------------------------------------------------------------------------------------------------------------------------------------------------------------------------------|---------------------------------|
| Normalized Difference Vegetation Index               | $NDVI = \rho_{800} - \rho_{680} / \rho_{800} + \rho_{680}$                                                                                                                                      | Rouse <i>et al.</i> (1974)      |
| Simple Ratio Index                                   | $SR = \rho_{800} / \rho_{680}$                                                                                                                                                                  | Rouse <i>et al.</i> (1974)      |
| Red Edge Normalized Difference Vegetation Index      | $RENDVI = \rho_{750} - \rho_{705} / \rho_{750} + \rho_{705}$                                                                                                                                    | Gitelson and Merzlyak (1994)    |
| Vogelmann Red Edge Index 1                           | $VOG1 = \rho_{740} / \rho_{720}$                                                                                                                                                                | Vogelmann <i>et al.</i> (1993)  |
| Vogelmann Red Edge Index 2                           | $VOG2 = \rho_{731} - \rho_{747} / \rho_{715} + 726$                                                                                                                                             | Vogelmann <i>et al.</i> (1993)  |
| Vogelmann Red Edge Index 3                           | $VOG3 = \rho_{731} - \rho_{747} / \rho_{715} + 720$                                                                                                                                             | Vogelmann <i>et al.</i> (1993)  |
| Browning Reflectance Index                           | $BRI = [(1/ \rho_{550}) - (1/ \rho_{700})] / \rho_{800}$                                                                                                                                        | Chivkunova <i>et al.</i> (2001) |
| Modified Chlorophyll Absorption Reflectance Index    | $MCARI = ((\rho_{700} - \rho_{670}) - 0.2(\rho_{700} - \rho_{550})) \times \rho_{700} / \rho_{670}$                                                                                             | Daughtry <i>et al.</i> (2000)   |
| Modified Chlorophyll Absorption Reflectance Index 2  | $MCARI2 = 1.5 \times [2.5 \times (\rho_{800} - \rho_{670}) - 1.3(\rho_{800} - \rho_{550})] \div \sqrt{((2 \times \rho_{800} + 1)2) - (6 \times \rho_{800} - 5 \times \sqrt{\rho_{670}}) - 0.5}$ | Haboudane <i>et al.</i> (2004)  |
| Modified Triangular Vegetation Index                 | $MTVI = \rho_{800} 1.2 \times [1.2 \times (\rho_{800} - \rho_{550}) - 2.5 (\rho_{670} - \rho_{750})]$                                                                                           | Haboudane <i>et al.</i> (2004)  |
| Modified Triangular Vegetation Index 2               | $MTVI2 = 1.5 \times [1.2 \times (\rho_{800} - \rho_{550}) - 2.5(\rho_{670} - \rho_{550})] \div \sqrt{((2 \times \rho_{800} + 1)2) - (6 \times \rho_{800} - 5 \times \sqrt{\rho_{670}}) - 0.5}$  | Haboudane <i>et al.</i> (2004)  |
| Transformed Chlorophyll Absorption Reflectance Index | $TCARI = 3 \times [((\rho_{700} - \rho_{670}) - 0.2(\rho_{700} - \rho_{550})) \times \rho_{700} / \rho_{670}]$                                                                                  | Haboudane <i>et al.</i> (2004)  |
| Triangular Vegetation Index                          | $TVI = 0.5 \times [120 \times (\rho_{750} - \rho_{550}) - 200 (\rho_{670} - \rho_{550})]$                                                                                                       | Broge and Leblanc (2001)        |
| Anthocyanin Reflectance Index 1                      | $ARI1 = (1/ \rho_{550}) - (1/ \rho_{700})$                                                                                                                                                      | Gitelson <i>et al.</i> (2001)   |
| Anthocyanin Reflectance Index 2                      | $ARI2 = \rho_{800}[(1/ \rho_{550}) - (1/ \rho_{700})]$                                                                                                                                          | Gitelson <i>et al.</i> (2001)   |
| Water Band Index                                     | $WBI = \rho_{900} / \rho_{970}$                                                                                                                                                                 | Gitelson <i>et al.</i> (2001)   |
| Normalized Difference Water Index                    | $NDWI = (\rho_{857} - \rho_{1241}) / (\rho_{857} + \rho_{1241})$                                                                                                                                | Gao (1996)                      |

| Index                                        | Formula                                                                                                                                                                                                           | Reference                     |
|----------------------------------------------|-------------------------------------------------------------------------------------------------------------------------------------------------------------------------------------------------------------------|-------------------------------|
| Moisture Stress Index                        | $MSI = \rho_{1599} / \rho_{819}$                                                                                                                                                                                  | Hunt and Rock (1989)          |
| Normalized Difference Infrared Index         | $NDII = (\rho_{819} - \rho_{1649}) / (\rho_{819} + \rho_{1649})$                                                                                                                                                  | Hardisky <i>et al.</i> (1983) |
| Cercospora Leaf Spot Index                   | $CLSI = [(\rho_{698} - \rho_{570}) / (\rho_{698} + \rho_{570})] - \rho_{764}$                                                                                                                                     | Mahlein <i>et al.</i> (2013)  |
| Modified Chlorophyll Absorption Integral     | $MCAI = ((\rho_{545} - \rho_{752})/2) \times (752 - 545) / (\rho_{545} + 545) \times \rho_{i} \times 1.423$                                                                                                       | Laudien <i>et al.</i> (2003)  |
| Optimized Soil Adjusted Vegetation Index     | $OSAVI = ((1 + 0.16) \times (\rho_{790} - \rho_{670})) / (\rho_{790} - \rho_{670} + 0.16)$                                                                                                                        | Rondeaux <i>et al.</i> (1996) |
| Global Environmental Monitoring Index        | $GEMI = \eta \times (1 - 0.25 \cdot \eta) - (\rho_{680} - 0.125 / 1 - \rho_{680})$<br>where $\eta = (2(\rho_{800} - \rho_{680}) + 1.5 \cdot \rho_{800} + 0.5 \cdot \rho_{680}) / (\rho_{800} + \rho_{680} + 0.5)$ | Pinty and Verstraete (1992)   |
| Difference Vegetation Index                  | $DVI = \rho_{800} - \rho_{680}$                                                                                                                                                                                   | Tucker (1979)                 |
| Green Difference Vegetation Index            | $GDVI = \rho_{800} - \rho_{550}$                                                                                                                                                                                  | Sripada <i>et al.</i> (2006)  |
| Green Normalized Difference Vegetation Index | $GNDVI = (\rho_{800} - \rho_{550}) / (\rho_{800} + \rho_{550})$                                                                                                                                                   | Gitelson and Merzlyak (1998)  |
| Green Ratio Vegetation Index                 | $GRVI = \rho_{800} / \rho_{550}$                                                                                                                                                                                  | Sripada <i>et al.</i> (2006)  |
| Infrared Percentage Vegetation Index         | $IPVI = \rho_{800} / (\rho_{800} + \rho_{680})$                                                                                                                                                                   | Crippen (1990)                |
| Renormalized Difference Vegetation Index     | $RDVI = (\rho_{800} - \rho_{680}) / \sqrt{\rho_{800} + \rho_{680}}$                                                                                                                                               | Roujean and Breon (1995)      |
| Modified Simple Ratio                        | $MSR = [(\rho_{800} / \rho_{680}) - 1] / \sqrt{(\rho_{800} / \rho_{680}) + 1}$                                                                                                                                    | Chen (1996)                   |
| Non-Linear Index                             | $NLI = (\rho_{8002} - \rho_{680}) / (\rho_{8002} + \rho_{680})$                                                                                                                                                   | Goel and Qin (1994)           |
| Modified Non-Linear Index                    | $MNLI = (\rho_{8002} - \rho_{680}) \times (1 + L) / (\rho_{8002} + \rho_{680} + L)$<br>Where $L=0.5$                                                                                                              | Peng <i>et al.</i> (2003)     |
| Soil Adjusted Vegetation Index               | $SAVI = [1.5 \times (\rho_{800} - \rho_{680})] / (\rho_{800} + \rho_{680} + 0.5)$                                                                                                                                 | Huete (1988)                  |
| Transformed Difference Vegetation Index      | $TDVI = \sqrt{0.5 + [(\rho_{800} - \rho_{680}) / (\rho_{800} + \rho_{680})]}$                                                                                                                                     | Bannari <i>et al.</i> (2002)  |
| Red Edge Position Index                      | $REP = \arg \max_w (\rho_{690} - 740)$                                                                                                                                                                            | Baranoski and Rokne (2005)    |
| Gitelson and Merzlyak Index 1                | $GMI1 = \rho_{750} / \rho_{550}$                                                                                                                                                                                  | Gitelson and Merzlyak (1998)  |
| Gitelson and Merzlyak Index 2                | $GMI2 = \rho_{750} / \rho_{700}$                                                                                                                                                                                  | Gitelson and Merzlyak (1998)  |
| Greenness Index                              | $G = \rho_{554} / \rho_{677}$                                                                                                                                                                                     | Smith <i>et al.</i> (1995)    |

| Index                                                       | Formula                                                             | Reference                         |
|-------------------------------------------------------------|---------------------------------------------------------------------|-----------------------------------|
| Lichtenthaler Index 1                                       | $LIC1 = (\rho_{790} - \rho_{680}) / (\rho_{790} + \rho_{680})$      | Lichtenthaler (1996)              |
| Nitrogen Related Index NRI1510                              | $NRI1510 = (\rho_{1510} - \rho_{660}) / (\rho_{1510} + \rho_{660})$ | Herrmann <i>et al.</i> (2010)     |
| Nitrogen Related Index NRI850                               | $NRI850 = (\rho_{850} - \rho_{660}) / (\rho_{850} + \rho_{660})$    | Behrens <i>et al.</i> (2006)      |
| Water Index                                                 | $WI = \rho_{1450} / \rho_{1050}$                                    | Thiel <i>et al.</i> (2010)        |
| Disease Water Stress Index 4                                | $DWSI4 = \rho_{550} / \rho_{680}$                                   | Apan <i>et al.</i> (2003)         |
| Carter Index 2                                              | $CRT2 = \rho_{695} / \rho_{760}$                                    | Carter (1994)                     |
| Zarco-Tejada & Miller Index (ZMI) or Chlorophyll Index (CI) | $ZMI = \rho_{750} / \rho_{710}$                                     | Zarco-Tejada <i>et al.</i> (2001) |
| Leaf Structure Index                                        | $LSI = \rho_{1110} / \rho_{810}$                                    | Sridhar <i>et al.</i> (2007)      |
| Photochemical Reflectance Index                             | $PRI = (\rho_{531} - \rho_{570}) / (\rho_{631} + \rho_{570})$       | Gamon <i>et al.</i> (1997)        |
| Normalized Difference Chlorophyll Index                     | $NDClw = (\rho_{727} - \rho_{1654}) / (\rho_{727} + \rho_{1654})$   | In this paper                     |

## References

- Apan A, Held A, Phinn S, Markley J.** 2003. Formulation and assessment of narrow-band vegetation indices from EO1 Hyperion imagery for discriminating sugarcane disease. *Spatial Sciences Institute Biennial Conference (SSC 2003): Spatial Knowledge Without Boundaries*. Canberra, Australia, 1-13.
- Bannari A, Asalhi H, Teillet P.** 2002. Transformed difference vegetation index (TDVI) for vegetation cover mapping. *IEEE International Geoscience and Remote Sensing Symposium*, Vol. 5, 3053-3055.
- Baranowski GVG, Rokne JG.** 2005. A practical approach for estimating the red edge position of plant leaf reflectance. *International Journal of Remote Sensing* **26**, 503-521.
- Behrens T, Müller J, Diepenbrock W.** 2006. Utilization of canopy reflectance to predict properties of oilseed rape (*Brassica napus* L.) and barley (*Hordeum vulgare* L.) during ontogenesis. *European Journal of Agronomy* **25**, 345-355.
- Broge NH, Leblanc E.** 2001. Comparing prediction power and stability of broadband and hyperspectral vegetation indices for estimation of green leaf area index and canopy chlorophyll density. *Remote Sensing of Environment* **76**, 156-172.
- Carter GA.** 1994. Ratios of leaf reflectances in narrow wavebands as indicators of plant stress. *International Journal of Remote Sensing* **15**, 697-703.
- Chen JM.** 1996. Evaluation of Vegetation Indices and a Modified Simple Ratio for Boreal Applications. *Canadian Journal of Remote Sensing* **22**, 229-242.

- Chivkunova O, Solovchenko A, Sokolova S, Merzlyak M, Reshetnikova I, AA G.** 2001. Reflectance Spectral Features and Detection of Superficial Scald-induced Browning in Storing Apple Fruit. *Journal of Russian Phytopathological Society* **2**, 73-77.
- Crippen RE.** 1990. Calculating the vegetation index faster. *Remote Sensing of Environment* **34**, 71-73.
- Daughtry CST, Walthall CL, Kim MS, de Colstoun EB, McMurtrey JE.** 2000. Estimating Corn Leaf Chlorophyll Concentration from Leaf and Canopy Reflectance. *Remote Sensing of Environment* **74**, 229-239.
- Gamon JA, Serrano L, Surfus JS.** 1997. The Photochemical Reflectance Index: An Optical Indicator of Photosynthetic Radiation Use Efficiency across Species, Functional Types, and Nutrient Levels. *Oecologia* **112**, 492-501.
- Gao B-c.** 1996. NDWI - A normalized difference water index for remote sensing of vegetation liquid water from space. *Remote Sensing of Environment* **58**, 257-266.
- Gitelson A, Merzlyak MN.** 1994. Spectral Reflectance Changes Associated with Autumn Senescence of *Aesculus hippocastanum* L. and *Acer platanoides* L. Leaves. Spectral Features and Relation to Chlorophyll Estimation. *Journal of Plant Physiology* **143**, 286-292.
- Gitelson AA, Merzlyak MN.** 1998. Remote sensing of chlorophyll concentration in higher plant leaves. *Advances in Space Research* **22**, 689-692.
- Gitelson AA, Merzlyak MN, Chivkunova OB.** 2001. Optical Properties and Nondestructive Estimation of Anthocyanin Content in Plant Leaves. *Photochemistry and Photobiology* **74**, 38-45.
- Goel NS, Qin W.** 1994. Influences of canopy architecture on relationships between various vegetation indices and LAI and Fpar: A computer simulation. *Remote Sensing Reviews* **10**, 309-347.
- Haboudane D, Miller J, Pattey E, PJ Z-T, Strachan I.** 2004. Hyperspectral vegetation indices and novel algorithms for predicting green LAI of crop canopies: Modeling and validation in the context of precision agriculture. *Remote Sensing of Environment* **90**, 337-352.
- Hardisky M, Klemas V, Smart R.** 1983. The influence of soil salinity, growth form, and leaf moisture on the spectral radiance of *Spartina alterniflora* canopies. *Photogrammetric Engineering and Remote Sensing* **49**, 77-83.
- Herrmann I, Karnieli A, Bonfil DJ, Cohen Y, Alchanatis V.** 2010. SWIR-based spectral indices for assessing nitrogen content in potato fields. *International Journal of Remote Sensing* **31**, 5127-5143.
- Huete AR.** 1988. A soil-adjusted vegetation index (SAVI). *Remote Sensing of Environment* **25**, 295-309.
- Hunt ER, Rock BN.** 1989. Detection of changes in leaf water content using Near- and Middle-Infrared reflectances. *Remote Sensing of Environment* **30**, 43-54.
- Laudien R, Bareth G, Doluschitz R.** 2003. Analysis of hyperspectral field data for detection of sugar beet diseases. *Proceedings of the EFITA conference*, Vol. 59. Debrecen, Hungary, 375-381.
- Lichtenthaler HK.** 1996. Vegetation Stress: An Introduction to the Stress Concept in Plants. *Journal of Plant Physiology* **148**, 4-14.
- Mahlein AK, Rumpf T, Welke P, Dehne HW, Plümer L, Steiner U, Oerke EC.** 2013. Development of spectral indices for detecting and identifying plant diseases. *Remote Sensing of Environment* **128**, 21-30.

- Peng G, Ruiliang P, Biging GS, Larrieu MR.** 2003. Estimation of forest leaf area index using vegetation indices derived from Hyperion hyperspectral data. *IEEE Transactions on Geoscience and Remote Sensing* **41**, 1355-1362.
- Pinty B, Verstraete M.** 1992. GEMI: a non-linear index to monitor global vegetation from satellites. *Vegetatio* **101**, 15-20.
- Rondeaux G, Steven M, Baret F.** 1996. Optimization of soil-adjusted vegetation indices. *Remote Sensing of Environment* **55**, 95-107.
- Roujean J-L, Breon F-M.** 1995. Estimating PAR absorbed by vegetation from bidirectional reflectance measurements. *Remote Sensing of Environment* **51**, 375-384.
- Rouse J, Haas R, Schell J, Deering D.** 1974. Monitoring vegetation systems in the Great Plains with ERTS. In: Fraden SC, Marcanti EP, Becker MA, eds. *NASA. Goddard Space Flight Center 3d ERTS-1 Symposium*, Vol. 1. Texas, USA: NASA, 309-317.
- Smith R, Adams J, Stephens D, Hick P.** 1995. Forecasting wheat yield in a Mediterranean-type environment from the NOAA satellite. *Australian Journal of Agricultural Research* **46**, 113-125.
- Sridhar BBM, Han FX, Diehl SV, Monts DL, Su Y.** 2007. Spectral reflectance and leaf internal structure changes of barley plants due to phytoextraction of zinc and cadmium. *International Journal of Remote Sensing* **28**, 1041-1054.
- Sripada RP, Heiniger RW, White JG, Meijer AD.** 2006. Aerial Color Infrared Photography for Determining Early In-Season Nitrogen Requirements in Corn. *Agronomy Journal* **98**, 968-977.
- Thiel M, Tath T, Ruckelshausen A.** 2010. Plant moisture measurement in field trials based on NIR spectral imaging - a feasibility study. *CIGR Workshop on Image Analysis in Agriculture*. Budapest, Hungary, 16-29.
- Tucker CJ.** 1979. Red and photographic infrared linear combinations for monitoring vegetation. *Remote Sensing of Environment* **8**, 127-150.
- Vogelmann JE, Rock BN, Moss DM.** 1993. Red edge spectral measurements from sugar maple leaves. *International Journal of Remote Sensing* **14**, 1563-1575.
- Zarco-Tejada P, JR M, Noland T, Mohammed G, Sampson P.** 2001. Scaling-up and model inversion methods with narrow-bandoptical indices for chlorophyll content estimation in closed forest canopies with hyperspectral data. *IEEE Transactions on Geoscience and Remote Sensing* **39**, 1491-1507.

**Table S3.** Correlation analysis of standard vegetation indices and NDCI<sub>w</sub> for chlorophyll (Chl) estimation.

| Vegetation indices | R <sup>2</sup> for Experiment 1 |          |           | R <sup>2</sup> for Experiment 2 |          |           |
|--------------------|---------------------------------|----------|-----------|---------------------------------|----------|-----------|
|                    | Chl a                           | Chl b    | Total Chl | Chl a                           | Chl b    | Total Chl |
| NDVI               | 0.474295                        | 0.509662 | 0.487518  | 0.491791                        | 0.135348 | 0.410487  |
| SR                 | 0.488232                        | 0.538561 | 0.505281  | 0.515934                        | 0.169509 | 0.440774  |
| RENDVI             | 0.521022                        | 0.554114 | 0.534116  | 0.738094                        | 0.347815 | 0.665033  |
| VOG1               | 0.648151                        | 0.690965 | 0.664850  | 0.806719                        | 0.484770 | 0.757069  |
| VOG2               | 0.733895                        | 0.795271 | 0.756003  | 0.794843                        | 0.484678 | 0.747854  |
| VOG3               | 0.732590                        | 0.795708 | 0.755116  | 0.792421                        | 0.480510 | 0.744839  |
| BRI                | 0.225153                        | 0.194883 | 0.219289  | 0.320426                        | 0.043175 | 0.247544  |
| MCARI              | 0.038788                        | 0.049697 | 0.041793  | 0.648110                        | 0.762985 | 0.696829  |
| MCARI2             | 0.593263                        | 0.609017 | 0.602676  | 0.542270                        | 0.169423 | 0.460139  |
| MTVI               | 0.617325                        | 0.648715 | 0.630888  | 0.578882                        | 0.213315 | 0.502553  |
| MTVI2              | 0.593263                        | 0.609017 | 0.602676  | 0.542270                        | 0.169423 | 0.460139  |
| TCARI              | 0.318387                        | 0.228395 | 0.296946  | 0.901574                        | 0.730975 | 0.894904  |
| TVI                | 0.544092                        | 0.570477 | 0.555725  | 0.464264                        | 0.127951 | 0.387579  |
| ARI1               | 0.488452                        | 0.496980 | 0.495080  | 0.539050                        | 0.176886 | 0.460445  |
| ARI2               | 0.584794                        | 0.629752 | 0.601432  | 0.601502                        | 0.218934 | 0.521270  |
| WBI                | 0.173482                        | 0.230246 | 0.188766  | 0.541919                        | 0.233605 | 0.481530  |
| NDWI               | 0.166353                        | 0.227115 | 0.182455  | 0.508988                        | 0.210801 | 0.449527  |
| MSI                | 0.173482                        | 0.230246 | 0.188766  | 0.541919                        | 0.233605 | 0.481530  |
| NDII               | 0.283460                        | 0.335835 | 0.298972  | 0.561284                        | 0.244380 | 0.499503  |
| CLSI               | 0.222335                        | 0.249116 | 0.231045  | 0.011723                        | 0.191891 | 0.033416  |
| MCAI               | 0.055895                        | 0.071141 | 0.060116  | 0.663695                        | 0.339198 | 0.605906  |
| OSVI               | 0.487154                        | 0.525872 | 0.501328  | 0.601607                        | 0.221852 | 0.522336  |
| GEMI               | 0.487154                        | 0.525872 | 0.501328  | 0.601607                        | 0.221852 | 0.522336  |
| DVI                | 0.507273                        | 0.548149 | 0.522171  | 0.555108                        | 0.218886 | 0.486683  |
| GDVI               | 0.312827                        | 0.360210 | 0.327439  | 0.725026                        | 0.410506 | 0.673397  |
| GNDVI              | 0.335762                        | 0.387125 | 0.351568  | 0.749775                        | 0.437823 | 0.700109  |
| GRVI               | 0.344370                        | 0.399007 | 0.361054  | 0.742656                        | 0.430059 | 0.692456  |
| IPVI               | 0.474295                        | 0.509662 | 0.487518  | 0.491791                        | 0.135348 | 0.410487  |
| RDVI               | 0.501915                        | 0.542236 | 0.516625  | 0.548863                        | 0.190213 | 0.472372  |
| MSR                | 0.482170                        | 0.525238 | 0.497372  | 0.510522                        | 0.163555 | 0.434661  |
| NLI                | 0.488306                        | 0.531192 | 0.503522  | 0.572074                        | 0.235356 | 0.504738  |
| MNLI               | 0.494839                        | 0.541685 | 0.511094  | 0.589746                        | 0.253395 | 0.523767  |
| SAVI               | 0.479150                        | 0.517258 | 0.493098  | 0.524520                        | 0.169455 | 0.447085  |
| TDVI               | 0.469552                        | 0.500606 | 0.481659  | 0.487016                        | 0.131663 | 0.405589  |
| REP                | 0.706759                        | 0.740519 | 0.721742  | 0.716657                        | 0.457175 | 0.658663  |
| GMI1               | 0.207687                        | 0.250321 | 0.220068  | 0.718771                        | 0.358920 | 0.653697  |
| GMI2               | 0.481757                        | 0.525681 | 0.497167  | 0.556157                        | 0.209267 | 0.484279  |
| G                  | 0.511464                        | 0.511268 | 0.516086  | 0.099128                        | 0.004815 | 0.055714  |

|                   |          |          |          |          |          |          |
|-------------------|----------|----------|----------|----------|----------|----------|
| LIC1              | 0.473264 | 0.508249 | 0.486383 | 0.491833 | 0.136749 | 0.411053 |
| NRI1510           | 0.774672 | 0.752410 | 0.776045 | 0.363436 | 0.214101 | 0.339883 |
| NRI1850           | 0.492067 | 0.532713 | 0.506765 | 0.667474 | 0.284055 | 0.591931 |
| WI                | 0.273569 | 0.324587 | 0.288652 | 0.644882 | 0.285833 | 0.575483 |
| DWSI4             | 0.501752 | 0.498760 | 0.505572 | 0.123402 | 0.001894 | 0.073341 |
| CRT2              | 0.446858 | 0.473287 | 0.457602 | 0.453804 | 0.117735 | 0.376002 |
| ZMI               | 0.593798 | 0.644070 | 0.611837 | 0.792200 | 0.439726 | 0.733294 |
| LSI               | 0.004824 | 0.003051 | 0.004378 | 0.336525 | 0.082091 | 0.276750 |
| PRI               | 0.580612 | 0.564471 | 0.581781 | 0.760401 | 0.365712 | 0.687369 |
| NDCI <sub>w</sub> | 0.930600 | 0.925800 | 0.937800 | 0.912998 | 0.805845 | 0.921944 |
